# Supplementary material
Source: Springer Nature journal article supplement (https://www.springermedizin.de/resource/supplementary/12893_2008_122_MOESM1_ESM.pdf/9512988)

## Publications considered for review

## Excluded publications

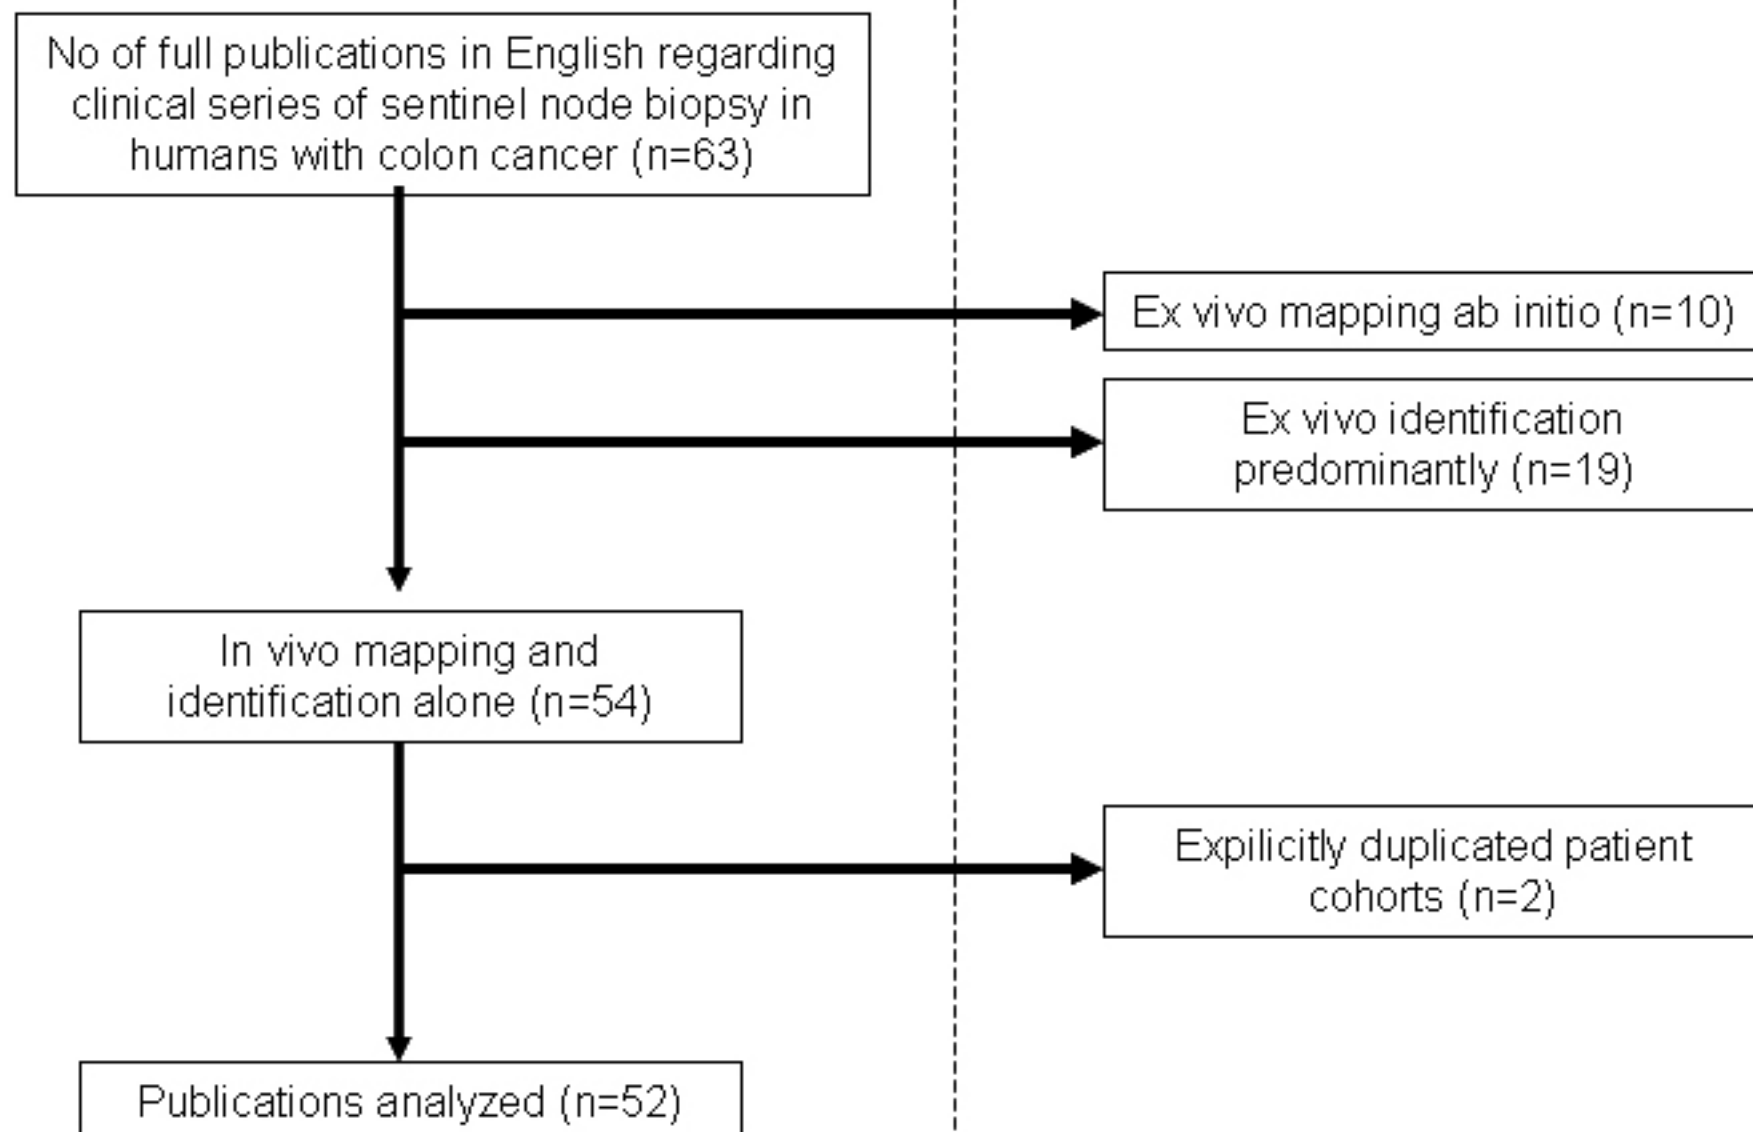

Supplement: MOESM1 [file 9512988]
